# Supplementary material
Source: MDPI journal article supplement (https://www.mdpi.com/1999-4907/9/7/406)
Supplement: s1 [file s1]

# Supplementary Material 1 to The short-term effects of experimental forestry treatments on site conditions in an oak-hornbeam forest

**Bence Kovács<sup>1,2,3\*</sup>, Flóra Tinya<sup>1</sup>, Erika Guba<sup>1</sup>, Csaba Németh<sup>2</sup>, Vivien Sass<sup>4</sup>, András Bidló<sup>4</sup>, Péter Ódor<sup>1,2</sup>**

<sup>1</sup> MTA Centre for Ecological Research, Institute of Ecology and Botany, Alkotmány út 2-4, H-2163 Vácrátót, Hungary

<sup>2</sup> MTA Centre for Ecological Research, GINOP Sustainable Ecosystems Research Group, Klebelsberg Kuno utca 3, H-8237 Tihany, Hungary

<sup>3</sup> Department of Plant Systematics, Ecology and Theoretical Biology, Eötvös Loránd University, Pázmány Péter sétány 1/C, H-1117 Budapest, Hungary

<sup>4</sup> University of Sopron, Institute of Environmental and Earth Sciences, Bajcsy-Zsilinszky utca 4, H-9400 Sopron, Hungary

\* Correspondence: kovacs.bence@okologia.mta.hu; Tel.: +36-28-360-122/107

## Supplementary Material 1 – Results of the soil profile analyses

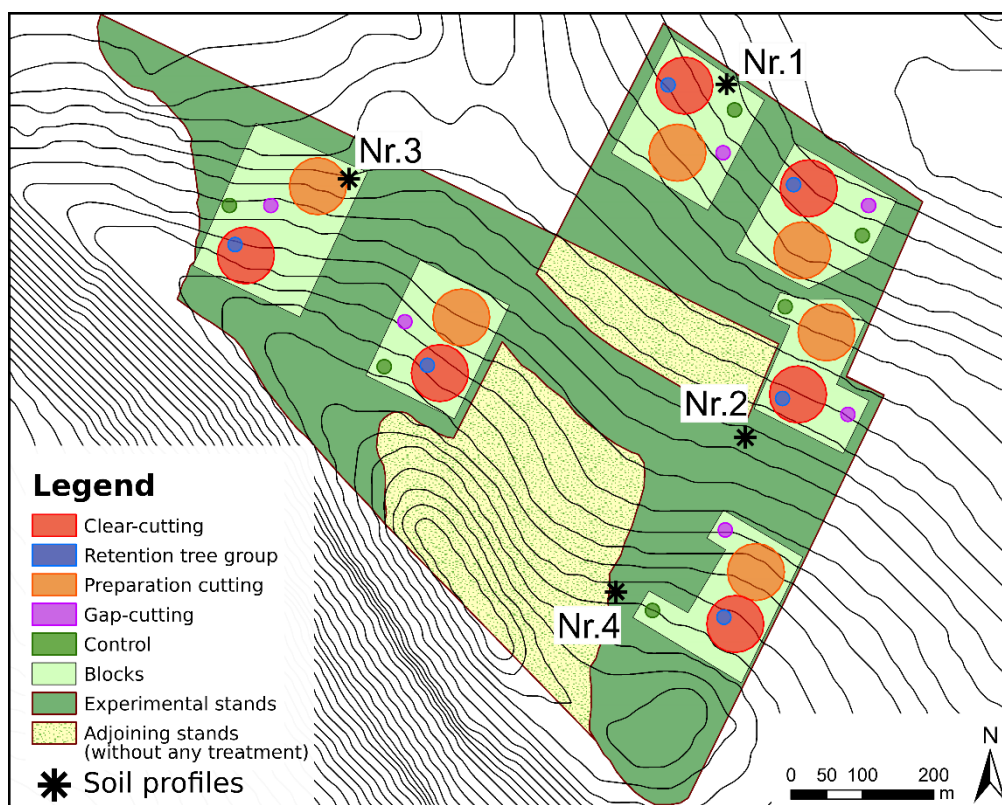

**Figure S1.1.** Four soil profiles were conducted across the experimental site for studying the soil conditions. All soil profiles were established and analyzed in 18-19 June 2014. The locations are marked with asterisks.

Here we present a short description of soil characterization in the localities shown in Figure A1.1. and a brief overview about the results of the four soil profiles. According to the (MSZ-08-0205:1978) standards the following variables are shown in the tables: # – the number of the layer distinguished by expert judgement; layer – upper and lower limit horizon (cm from mineral soil surface); Coarse fragments – volume of the coarse particles (%); pH – pH measured by using H<sub>2</sub>O and KCl solutions, respectively; CaCO<sub>3</sub> – presence / content of carbonates within a given layer (%); y<sub>1</sub> – hydrolytic acidity; y<sub>2</sub> – exchangeable acidity; soil texture – the volumetric content of clay (<0.002 mm), silt (0.002-0.02 mm), fine sand (0.02-0.2 mm) and coarse sand (0.2-2 mm), separately (%); C – soil organic carbon content (%); N – total nitrogen content (%); P<sub>AL</sub> – extractable phosphorus (mg/100 g soil); K<sub>AL</sub> – extractable potassium (mg/100 g soil).

Soil pH was potentiometrically measured using supernatant suspension of 10 g air-dried and sieved (<2 mm) samples and 25 ml of distilled water (pH(H<sub>2</sub>O)) and 25 ml of 1 mol/l KCL (pH(KCL)) solution,

respectively (MSZ-08-0205:1978). In the case of  $y_1$ , 40 g air-dried soil sample was extracted with 100 ml 1 mol/l  $\text{Ca}(\text{CH}_3\text{COO})_2$  solution; regarding  $y_2$ , extractions were made using unbuffered 1 mol/l KCl solution. In both cases, measurements were performed by titration (Ballenegger and di Gléria 1962). Kúron's method was applied for gauging  $h_y$  of air-dry soils (Verstraeten & Livens, 1971): with 50% (v/v)  $\text{H}_2\text{SO}_4$  solution and 35.2% RH according to (MSZ-08-0205:1978). Chemical compounds were evaluated on composite samples of the 1:1 mixture of the four, sieved ( $<0.5$  mm) subsamples per plot. Total soil carbon and nitrogen content were determined by dry combustion method using Elementar vario MAX CNS-analyzer (Elementar Analysensysteme, Langenselbold, Germany) applying the ISO standards (ISO 10694:1995; ISO 13878:1998): soil samples were weighed up to 80-100 g, and a tungsten oxide catalyst was added. The applied combustion temperature was 1140°C. Plant available phosphorus and potassium were determined by ammonium lactate (AL) solution method (0.1 M  $\text{NH}_4$ -lactate + 0.4 M HOAc, adjusted to pH 3.75) developed by Egnér et al. (1960 cf. Carter & Gregorich, 2008) according to the operative Hungarian standards (MSZ 20135:1999).  $\text{P}_2\text{O}_5$  was measured colorimetrically,  $\text{K}_2\text{O}$  was quantified by flame photometry.

## Soil profile Nr.1

### Bedrock:

loess with other sediments, limestone and sandstone stones and boulders are present

### Genetic soil type:

brown forest soils with clay illuviation (luvisol)

### Soil texture

loam / clay loam

### Coarse fragments:

below the depth of 100 cm; 10 V/V%

### Notes:

iron and manganese concretion in the deeper layers

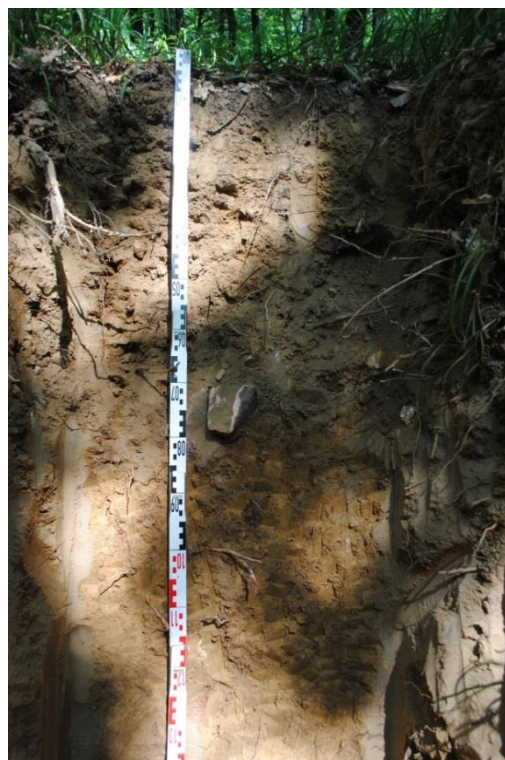

|   | Layer (cm) | Coarse fragm. (%) | pH (H <sub>2</sub> O) | pH (KCl) | CaCO <sub>3</sub> (%) | y <sub>1</sub> | y <sub>2</sub> | h <sub>y</sub> | Soil texture |          |               |                 | SOC (%) | N (%) | P <sub>2</sub> O <sub>5</sub> K <sub>2</sub> O |     |
|---|------------|-------------------|-----------------------|----------|-----------------------|----------------|----------------|----------------|--------------|----------|---------------|-----------------|---------|-------|------------------------------------------------|-----|
|   |            |                   |                       |          |                       |                |                |                | Clay (%)     | Silt (%) | Fine sand (%) | Coarse sand (%) |         |       | mg/100 g soil                                  |     |
| 1 | 0-10       | -                 | 4.9                   | 4.0      | -                     | 30.74          | 21.89          | 2.08           | 23           | 34       | 37            | 6               | 4.57    | 0.20  | 2.6                                            | 9.5 |
| 2 | 10-20      | -                 | 4.6                   | 3.7      | -                     | 30.01          | 21.70          | 1.74           | 21           | 30       | 43            | 6               | 2.05    | 0.10  | 1.5                                            | 6.3 |
| 3 | 20-40      | -                 | 4.8                   | 3.7      | -                     | 26.52          | 21.70          | 1.93           | 9            | 46       | 39            | 6               | 1.90    | 0.10  | 0.4                                            | 6.6 |
| 4 | 40-70      | -                 | 4.8                   | 3.7      | -                     | 19.17          | 18.03          | 2.40           | 33           | 26       | 35            | 6               | 1.40    | 0.08  | 1.6                                            | 7.8 |
| 5 | 70-100     | -                 | 5.1                   | 3.7      | -                     | 12.58          | 11.09          | 2.86           | 33           | 24       | 36            | 7               | 0.60    | 0.05  | -                                              | 8.0 |
| 6 | 100-150    | -                 | 6.1                   | 5.2      | -                     | 8.82           | -              | 2.81           | 29           | 30       | 37            | 4               | 0.62    | 0.04  | 1.9                                            | 6.4 |
| 7 | 150-200    | -                 | 7.4                   | 6.9      | 15                    | -              | -              | 1.75           | 17           | 28       | 42            | 13              | 0.85    | 0.03  | 1.6                                            | 5.1 |

## Soil profile Nr.2

### Bedrock:

loess with other sediments

### Genetic soil type:

brown forest soils with clay illuviation  
(luvisol)

### Soil texture:

loam / clay loam

### Coarse fragments:

minimal

### Notes:

iron and manganese concretion in the deeper layers

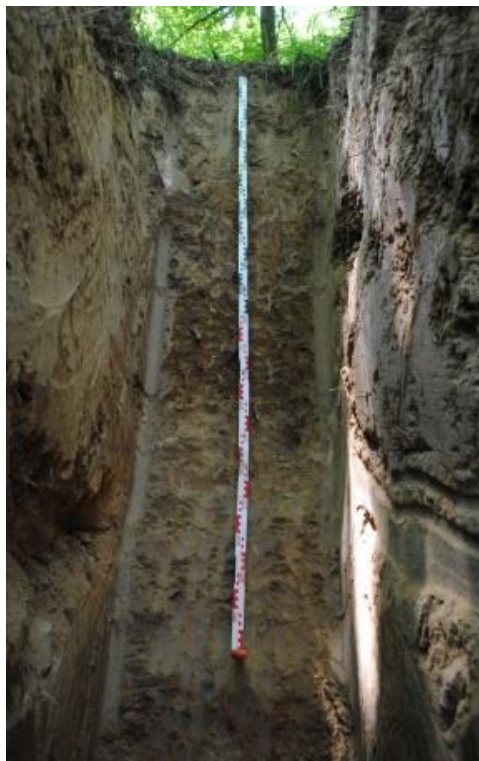

|   | Layer<br>(cm) | Coarse<br>fragm.<br>(%) | pH<br>(H <sub>2</sub> O) | pH<br>(KCl) | CaCO <sub>3</sub><br>(%) | y <sub>1</sub> | y <sub>2</sub> | h <sub>y</sub> | Soil texture |             |                     |                       | SOC<br>(%) | N<br>(%) | P <sub>2</sub> O <sub>5</sub> | K <sub>2</sub> O |
|---|---------------|-------------------------|--------------------------|-------------|--------------------------|----------------|----------------|----------------|--------------|-------------|---------------------|-----------------------|------------|----------|-------------------------------|------------------|
|   |               |                         |                          |             |                          |                |                |                | Clay<br>(%)  | Silt<br>(%) | Fine<br>sand<br>(%) | Coarse<br>sand<br>(%) |            |          | mg/100 g soil                 |                  |
| 1 | 0-10          | -                       | 4.6                      | 3.7         | -                        | 39.01          | 23.38          | 1.95           | 23           | 26          | 45                  | 6                     | 3.97       | 0.19     | 4.0                           | 7.5              |
| 2 | 10-20         | -                       | 4.4                      | 3.5         | -                        | 37.41          | 26.23          | 1.64           | 21           | 30          | 43                  | 6                     | 2.52       | 0.13     | 1.0                           | 5.3              |
| 3 | 20-50         | -                       | 4.7                      | 3.6         | -                        | 25.10          | 20.01          | 1.64           | 21           | 32          | 41                  | 6                     | 1.21       | 0.07     | 0.2                           | 5.2              |
| 4 | 50-90         | -                       | 5.1                      | 3.8         | -                        | 13.57          | 10.08          | 2.84           | 31           | 30          | 34                  | 5                     | 0.58       | 0.04     | 2.2                           | 8.8              |
| 5 | 90-130        | -                       | 5.5                      | 4.8         | -                        | 10.39          | 4.77           | 2.91           | 29           | 30          | 35                  | 6                     | 0.46       | 0.04     | 6.2                           | 8.8              |
| 6 | 130-210       | -                       | 7.8                      | 6.8         | 5                        | -              | -              | 1.83           | 17           | 32          | 44                  | 7                     | 0.72       | 0.04     | 2.8                           | 5.4              |
| 7 | 210-250       | -                       | 7.7                      | 6.9         | 2                        | -              | -              | 3.80           | 39           | 20          | 28                  | 13                    | 0.47       | 0.04     | 2.9                           | 7.2              |

### Soil profile Nr.3

**Bedrock:**

limestone and loess with other sediments

**Genetic soil type:**

rendzic leptosol and brown forest soils with clay illuviation (luvisol)

**Soil texture:**

loam

**Coarse fragments:**

increasing downwards

**Notes:**

-

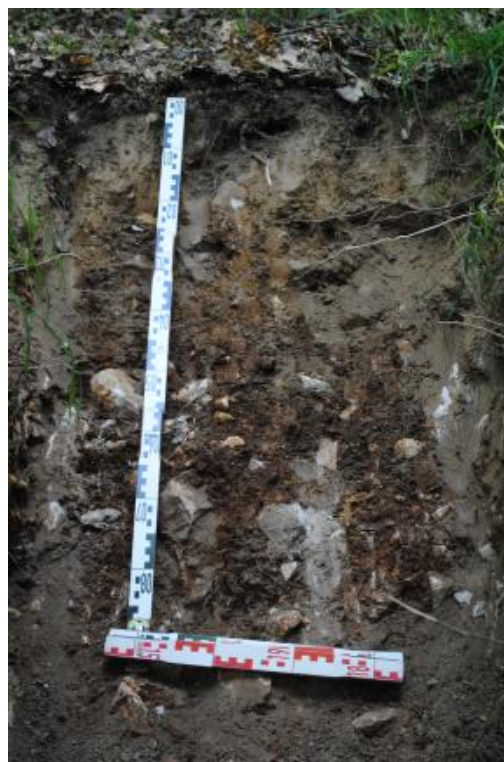

|   | Layer (cm) | Coarse fragm. (%) | pH (H <sub>2</sub> O) | pH (KCl) | CaCO <sub>3</sub> (%) | y <sub>1</sub> | y <sub>2</sub> | hy   | Soil texture |          |               |                 | SOC (%) | N (%) | P <sub>2</sub> O <sub>5</sub> | K <sub>2</sub> O |
|---|------------|-------------------|-----------------------|----------|-----------------------|----------------|----------------|------|--------------|----------|---------------|-----------------|---------|-------|-------------------------------|------------------|
|   |            |                   |                       |          |                       |                |                |      | Clay (%)     | Silt (%) | Fine sand (%) | Coarse sand (%) |         |       | mg/100 g soil                 |                  |
| 1 | 0-10       | -                 | 4.6                   | 3.7      | -                     | 40.89          | 20.49          | 2.23 | 19           | 28       | 44            | 9               | 5.70    | 0.26  | 0-10                          | -                |
| 2 | 10-20      | -                 | 4.6                   | 3.5      | -                     | 33.75          | 19.29          | 1.96 | 25           | 26       | 39            | 10              | 2.53    | 0.12  | 10-20                         | -                |
| 3 | 20-30      | -                 | 5.3                   | 4.1      | -                     | 18.08          | 7.33           | 2.36 | 29           | 26       | 34            | 11              | 2.25    | 0.12  | 20-30                         | -                |
| 4 | 30-70      | 21                | 6.9                   | 6.2      | -                     | -              | -              | 3.61 | 35           | 26       | 27            | 12              | 2.63    | 0.12  | 30-70                         | 21               |



## Soil profile Nr.4

|                                                                                                                                                                                                                                                                                                    |                                                                                     |
|----------------------------------------------------------------------------------------------------------------------------------------------------------------------------------------------------------------------------------------------------------------------------------------------------|-------------------------------------------------------------------------------------|
| <p><b>Bedrock:</b></p> <p>limestone and loess with other sediments</p> <p><b>Genetic soil type:</b></p> <p>brown forest soils with clay illuviation (luvisol)</p> <p><b>Soil texture:</b></p> <p>loam / clay loam</p> <p><b>Coarse fragments:</b></p> <p>minimal</p> <p><b>Notes:</b></p> <p>-</p> |  |
|----------------------------------------------------------------------------------------------------------------------------------------------------------------------------------------------------------------------------------------------------------------------------------------------------|-------------------------------------------------------------------------------------|

|   | Layer (cm) | Coarse fragm. (%) | pH (H <sub>2</sub> O) | pH (KCl) | CaCO <sub>3</sub> (%) | y <sub>1</sub> | y <sub>2</sub> | hy   | Soil texture |          |               |                 | SOC (%) | N (%) | P <sub>2</sub> O <sub>5</sub> | K <sub>2</sub> O |
|---|------------|-------------------|-----------------------|----------|-----------------------|----------------|----------------|------|--------------|----------|---------------|-----------------|---------|-------|-------------------------------|------------------|
|   |            |                   |                       |          |                       |                |                |      | Clay (%)     | Silt (%) | Fine sand (%) | Coarse sand (%) |         |       | mg/100 g soil                 |                  |
| 1 | 0-10       | -                 | 47                    | 3.6      | -                     | 31.99          | 16.63          | 1.44 | 11           | 26       | 44            | 19              | 3.66    | 0.15  | 3.0                           | 6.4              |
| 2 | 10-20      | -                 | 4.3                   | 3.6      | -                     | 25.39          | 19.12          | 0.99 | 11           | 26       | 42            | 21              | 2.04    | 0.08  | 0.8                           | 3.5              |
| 3 | 20-50      | -                 | 4.3                   | 3.5      | -                     | 24.71          | 24.11          | 0.99 | 13           | 26       | 41            | 20              | 0.89    | 0.05  | 0.5                           | 2.8              |
| 4 | 50-80      | -                 | 4.7                   | 3.5      | -                     | 24.16          | 23.02          | 2.11 | 25           | 22       | 38            | 15              | 0.59    | 0.04  | 0.1                           | 6.1              |
