# Supplementary material
Source: MDPI journal article supplement (https://www.mdpi.com/1999-4907/9/7/406)
Supplement: s1 [file s1]

# Supplementary Material 2 to The short-term effects of experimental forestry treatments on site conditions in an oak-hornbeam forest

**Bence Kovács<sup>1,2,3\*</sup>, Flóra Tinya<sup>1</sup>, Erika Guba<sup>1</sup>, Csaba Németh<sup>2</sup>, Vivien Sass<sup>4</sup>, András Bidló<sup>4</sup>, Péter Ódor<sup>1,2</sup>**

<sup>1</sup> MTA Centre for Ecological Research, Institute of Ecology and Botany, Alkotmány út 2-4, H-2163 Vácrátót, Hungary

<sup>2</sup> MTA Centre for Ecological Research, GINOP Sustainable Ecosystems Research Group, Klebelsberg Kuno utca 3, H-8237 Tihany, Hungary

<sup>3</sup> Department of Plant Systematics, Ecology and Theoretical Biology, Eötvös Loránd University, Pázmány Péter sétány 1/C, H-1117 Budapest, Hungary

<sup>4</sup> University of Sopron, Institute of Environmental and Earth Sciences, Bajcsy-Zsilinszky utca 4, H-9400 Sopron, Hungary

\* Correspondence: kovacs.bence@okologia.mta.hu; Tel.: +36-28-360-122/107

**Supplementary Material 2** – Additional information about the experimental site and treatments of the ‘Pilis Experiment’

Clear-cutting

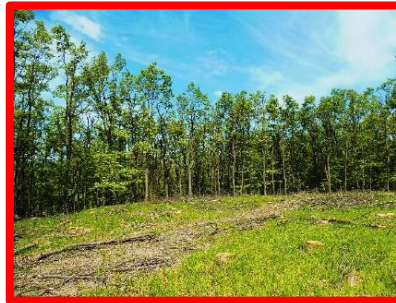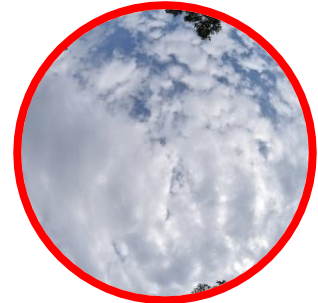

Retention tree group

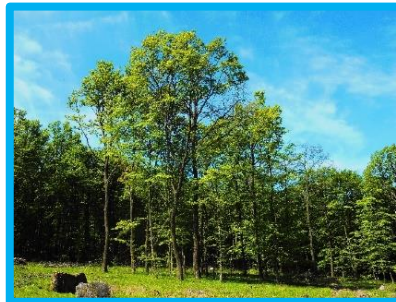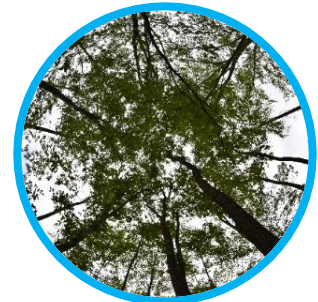

Preparation cutting

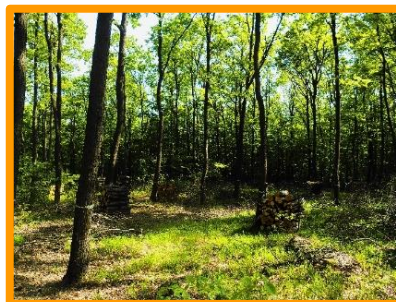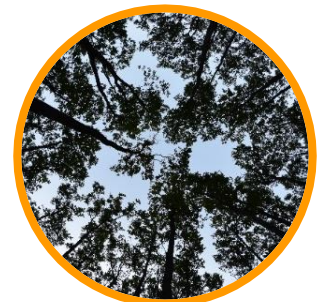

Gap-cutting

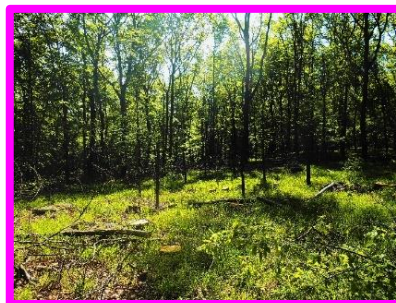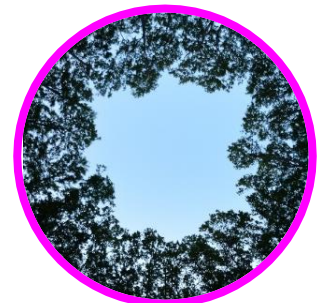

Control

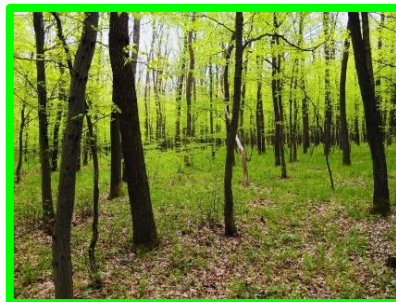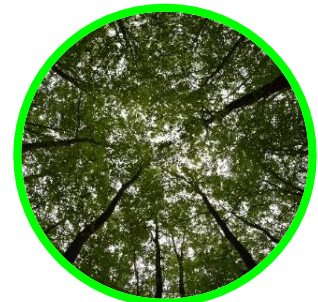

**Figure S2.1.** Stand and fish-eye photos of the treatments within the Pilis Experiment.

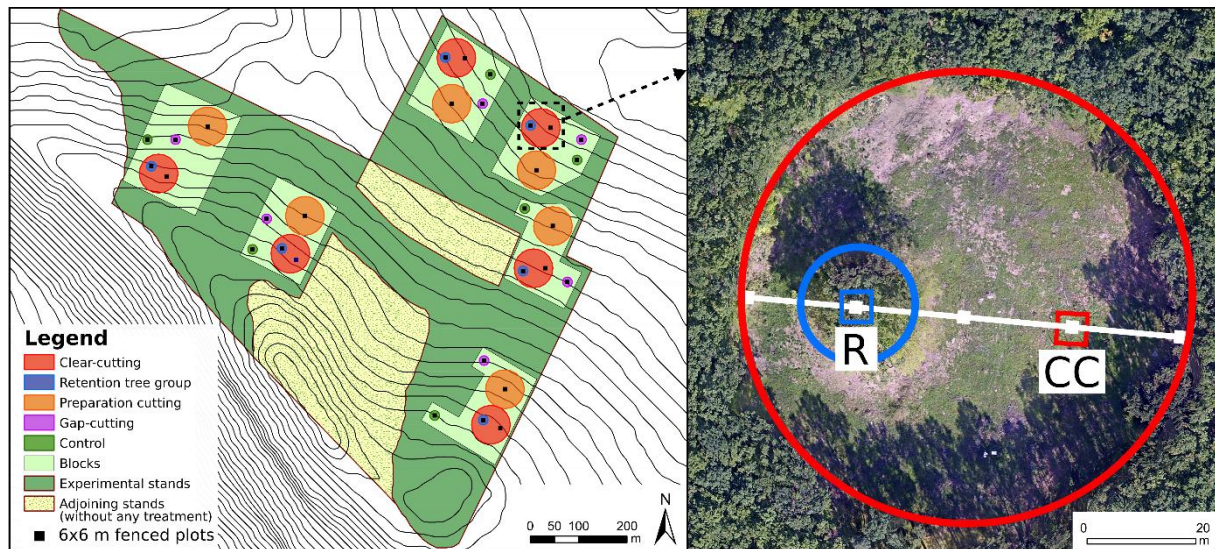

**Figure S2.2.** Spatial configuration of the measurement plots within the different treatment types. The  $6 \times 6$  m fenced plots are pictured as black squares (*left* panel). Plots of retention tree group (R) and clear-cutting (CC) were shifted to the 1:3 intersections along mainly the east-west axis (photo on the *right*).



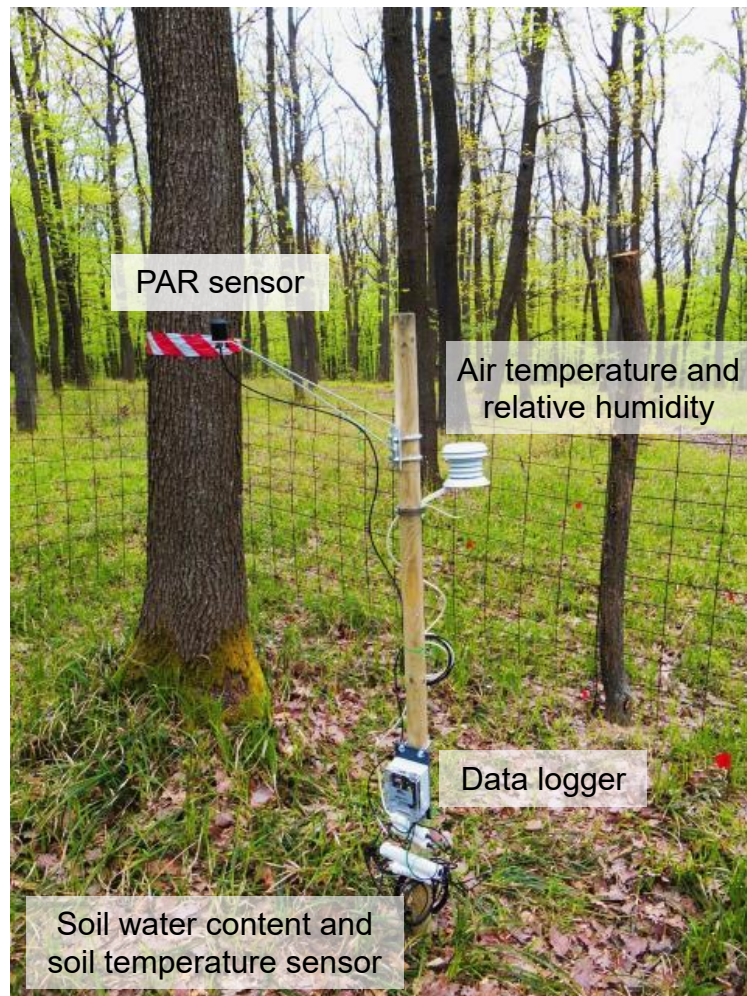

**Figure S2.3. The instrumentation of the microclimate measurements.** 4-channelled Onset 'HOBO H021-002' data loggers (Onset Computer Corporation, Bourne, MA) were mounted on wooden poles. Photosynthetically active radiation (PAR,  $\lambda=400-700$  nm) was measured at 150 cm above ground level using Onset 'S-LIA-M003' quantum sensors. Air temperature and relative humidity data were collected at 130 cm above ground level with Onset 'S-THB-M002' combined T/RH sensors housed in standard radiation shields to avoid direct sunlight. Soil temperature was measured with 'S-TMB-M002' 12-Bit temperature sensors by Onset placed 2 cm below ground. Soil water content was collected by Onset 'S-SMD-M005' soil moisture sensors buried 20 cm below ground level to measure the average soil moisture in 10-20 cm soil depth.
