# Supplementary material
Source: MDPI journal article supplement (https://www.mdpi.com/1999-4907/9/7/406)
Supplement: s1 [file s1]

# Supplementary Material 3 to The short-term effects of experimental forestry treatments on site conditions in an oak-hornbeam forest

**Bence Kovács<sup>1,2,3\*</sup>, Flóra Tinya<sup>1</sup>, Erika Guba<sup>1</sup>, Csaba Németh<sup>2</sup>, Vivien Sass<sup>4</sup>, András Bidló<sup>4</sup>, Péter Ódor<sup>1,2</sup>**

<sup>1</sup> MTA Centre for Ecological Research, Institute of Ecology and Botany, Alkotmány út 2-4, H-2163 Vácrátót, Hungary

<sup>2</sup> MTA Centre for Ecological Research, GINOP Sustainable Ecosystems Research Group, Klebelsberg Kuno utca 3, H-8237 Tihany, Hungary

<sup>3</sup> Department of Plant Systematics, Ecology and Theoretical Biology, Eötvös Loránd University, Pázmány Péter sétány 1/C, H-1117 Budapest, Hungary

<sup>4</sup> University of Sopron, Institute of Environmental and Earth Sciences, Bajcsy-Zsilinszky utca 4, H-9400 Sopron, Hungary

\* Correspondence: kovacs.bence@okologia.mta.hu; Tel.: +36-28-360-122/107

**Supplementary Material 3** – Effect of treatments on microclimate, litter and soil variables in 2014 (pre-treatment year)

**Table S3.1.** The results of linear mixed effects models performed for site condition variables and the mean ( $\pm$  standard deviation) among the treatment levels in 2014. PAR: photosynthetically active radiation ( $\mu\text{Em}^{-2}\text{s}^{-1}$ ); DIFN: relative diffuse light (%);  $T_{\text{air}}$ : air temperature ( $^{\circ}\text{C}$ ); RH: relative humidity (%); VPD: vapor pressure deficit (kPa);  $T_{\text{soil}}$ : soil temperature ( $^{\circ}\text{C}$ ); SWC: soil moisture ( $\text{m}^3/\text{m}^3$ ); Litter mass: total mass of collected litter on the surface ( $\text{gm}^{-2}$ ); Litter pH: litter pH in water; Litter moisture content: gravimetric moisture content of litter samples (%); Soil pH: soil pH in water; hy: Kuron's hygrscopicity (%); [SOC]: total soil carbon content (%); [N]: total nitrogen content (%);  $[P_{\text{AL}}]$ : concentration of AL-soluble phosphorus (mg/100 g soil);  $[K_{\text{AL}}]$ : concentration of AL-soluble potassium (mg/100 g soil). 'd' refers to the difference from values measured in control plots. For modeling, 24-hour-means were used except in the case of PAR, where daytime (6:00-18:00 UTC) means were calculated. Treatment types: 'CC' – clear-cutting; 'G' – gap-cutting; 'P' – preparation cutting and 'R' – retention tree group. As fix factor treatment was used; block was random factor. F and p values of the model statistics are presented. Superscripts refer to significant differences among treatments (pairwise Tukey comparisons,  $\alpha=0.05$ ), treatment codes marked with bold indicates significant departures from control ( $\alpha=0.05$ ).

| Dependent variable              | F            | p             | CC                     | G                    | P                       | R                       |
|---------------------------------|--------------|---------------|------------------------|----------------------|-------------------------|-------------------------|
| <i>d</i> PAR mean               | 2.217        | 0.0878        | $13.58 \pm 27.64$      | $3.09 \pm 23.90$     | $8.36 \pm 26.72$        | $9.22 \pm 21.89$        |
| <i>d</i> PAR IQR                | 0.657        | 0.5794        | $23.94 \pm 36.49$      | $19.58 \pm 26.72$    | $24.63 \pm 32.75$       | $21.51 \pm 26.93$       |
| <i>d</i> $T_{\text{air}}$ mean  | <b>6.943</b> | <b>0.0002</b> | $0.004 \pm 0.084^a$    | $-0.011 \pm 0.101^a$ | $-0.042 \pm 0.093^{ab}$ | $-0.074 \pm 0.101^b$    |
| <i>d</i> $T_{\text{air}}$ IQR   | 0.234        | 0.8729        | $0.211 \pm 0.090$      | $0.201 \pm 0.106$    | $0.213 \pm 0.099$       | $0.216 \pm 0.121$       |
| <i>d</i> RH mean                | 0.241        | 0.8677        | $0.194 \pm 0.812$      | $0.307 \pm 1.181$    | $0.243 \pm 1.142$       | $0.196 \pm 0.961$       |
| <i>d</i> RH IQR                 | 0.009        | 0.9608        | $1.770 \pm 0.851$      | $1.691 \pm 0.791$    | $1.793 \pm 0.837$       | $1.731 \pm 0.853$       |
| <i>d</i> VPD mean               | 0.523        | 0.6671        | $-0.001 \pm 0.018$     | $-0.004 \pm 0.024$   | $-0.004 \pm 0.022$      | $-0.004 \pm 0.021$      |
| <i>d</i> VPD IQR                | 0.078        | 0.9721        | $0.035 \pm 0.023$      | $0.033 \pm 0.022$    | $0.034 \pm 0.021$       | $0.035 \pm 0.025$       |
| <i>d</i> $T_{\text{soil}}$ mean | 2.529        | 0.0588        | $0.148 \pm 0.402$      | $-0.019 \pm 0.377$   | $0.089 \pm 0.356$       | $-0.027 \pm 0.422$      |
| <i>d</i> $T_{\text{soil}}$ IQR  | 2.240        | 0.0852        | $0.467 \pm 0.373$      | $0.363 \pm 0.266$    | $0.379 \pm 0.358$       | $0.322 \pm 0.240$       |
| <i>d</i> SWC mean               | <b>7.404</b> | <b>0.0001</b> | $0.004 \pm 0.032^{ab}$ | $0.014 \pm 0.046^b$  | $-0.02 \pm 0.056^c$     | $-0.006 \pm 0.041^{ac}$ |
| <i>d</i> Litter mass            | 0.180        | 0.9090        | $-45.2 \pm 245.76$     | $-7.85 \pm 189.22$   | $-45.73 \pm 294.44$     | $6.45 \pm 224.57$       |
| <i>d</i> Litter pH              | 0.755        | 0.5264        | $0.024 \pm 0.271$      | $-0.025 \pm 0.156$   | $-0.088 \pm 0.163$      | $0.052 \pm 0.283$       |
| <i>d</i> Litter moisture        | 1.202        | 0.3223        | $1.066 \pm 2.355$      | $-0.172 \pm 2.175$   | $0.955 \pm 2.761$       | $1.596 \pm 2.050$       |
| <i>d</i> Soil pH                | 2.458        | 0.0772        | $-0.003 \pm 0.117$     | $0.136 \pm 0.189$    | $0.003 \pm 0.158$       | $0.172 \pm 0.301$       |
| <i>d</i> hy                     | 1.481        | 0.2346        | $-0.006 \pm 0.114$     | $0.034 \pm 0.131$    | $0.086 \pm 0.373$       | $0.305 \pm 0.592$       |
| <i>d</i> [SOC]                  | 0.414        | 0.7437        | $0.325 \pm 1.312$      | $0.753 \pm 1.227$    | $0.448 \pm 1.010$       | $1.026 \pm 1.914$       |
| <i>d</i> [N]                    | 0.605        | 0.6160        | $0.005 \pm 0.038$      | $0.008 \pm 0.042$    | $-0.001 \pm 0.035$      | $0.024 \pm 0.055$       |
| <i>d</i> $[P_{\text{AL}}]$      | 0.042        | 0.9885        | $-0.151 \pm 1.210$     | $0.023 \pm 1.860$    | $0.192 \pm 2.102$       | $0.618 \pm 3.217$       |
| <i>d</i> $[K_{\text{AL}}]$      | 0.179        | 0.9095        | $-0.550 \pm 4.734$     | $-0.667 \pm 3.865$   | $-0.500 \pm 4.843$      | $0.308 \pm 5.412$       |
